# Supplementary material for: l-Serine Biosensor-Controlled Fermentative Production of l-Tryptophan Derivatives by Corynebacterium glutamicum
Source: MDPI journal article supplement (doi:10.3390/biology11050744), 2022-05-13
Supplement: s1 [file s1]

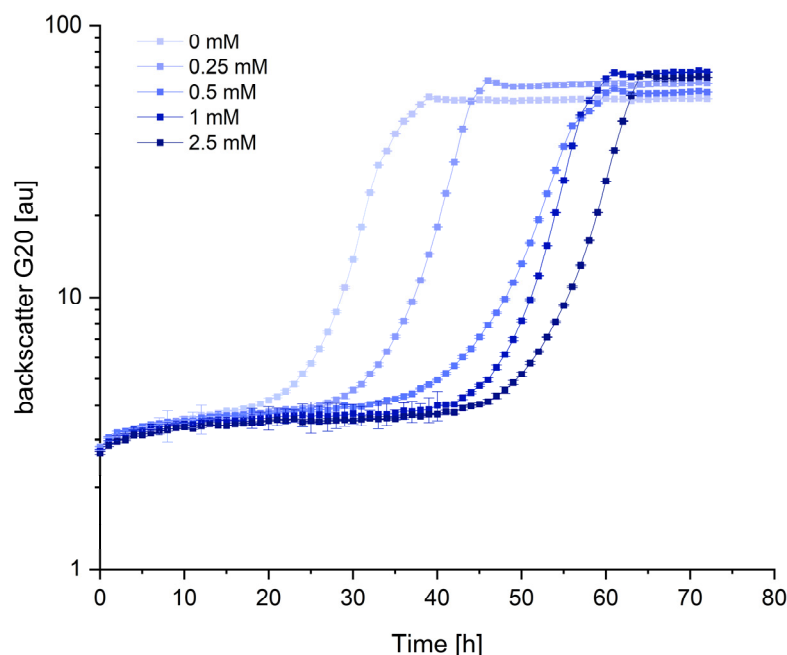

**Supplementary Figure S1. 5-HTP effect on the growth of *C. glutamicum* wild-type.** WT strain was grown in CGXII minimal medium and cultivated in BioLector micro-cultivation system. 5-HTP was dissolved in MeOH; hence, the MeOH concentration was kept constant at 2 M across all 5-HTP concentrations tested. Means and standard deviations of three replicate cultivations are shown.

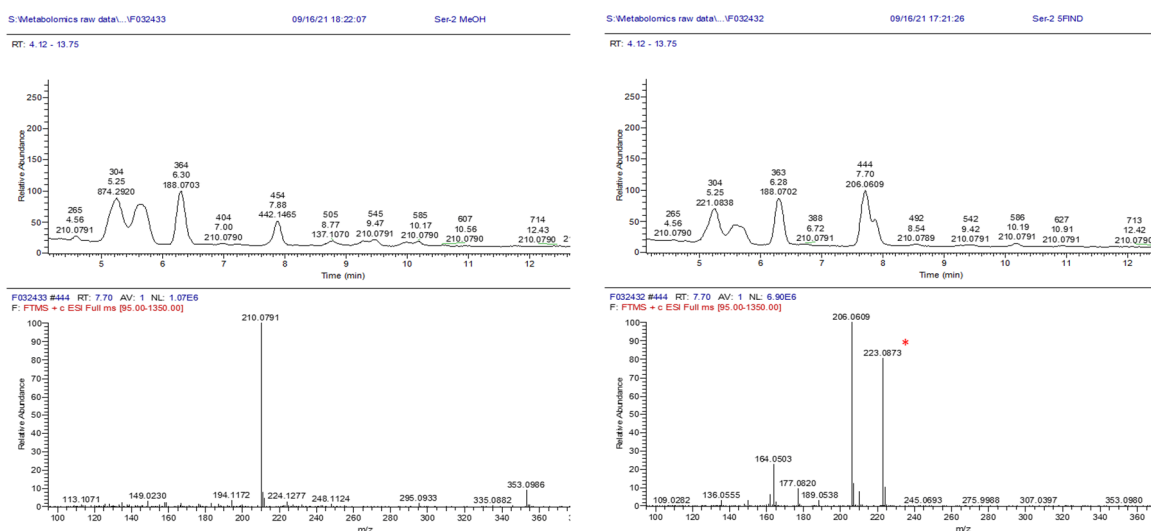

**Supplementary Figure S2. HPLC-MS analysis of 5-FTP production of SER2 pSdS-*trpB* strain cultivated in the presence of 1 mM 5-FI (right) or without (left).** For the control cultivation without the substrate, 0,124 M MeOH was used instead because 5-FI was dissolved in MeOH.
